# Supplementary material for: Susceptibility to Anthrax Lethal Toxin-Induced Rat Death Is Controlled by a Single Chromosome 10 Locus That Includes rNlrp1
Source: PubMed Central journal article supplement (PMC2873920; doi:10.1371/journal.ppat.1000906), 2010-05-20
Supplement: ppat.1000906.s003.pdf [file ppat.1000906.s003.pdf]

Allele 1 MEESQSKQESNTRVAQHGSQQDVPDPTFQTKRALERERSKPRRPLFRVQLQSLPGWSSSTNDVPLSQLIREMDHESRRCIHRSKSKKLDRESEHISQGTIPEIYEKRRKETISHTQSMQEKYL 120  
Allele 2 MEESQSKQESNTRVAQHGSQQDVPDPTFQTKRALERERSKPRRPLFRVQLQSLPGWSSSTNDVPLSQLIREMDHESRRCIHRSKSKKLDRESEHISQGTIPEIYEKRRKETISHTQSMQEKYL 120  
Allele 3 MGESQSKQESNTRVAQHGSQQDVPDPTFQTKRALERERSKPRRPLFRVQLQSLPGWSSSTNDVPLSQLIREMDHESRRHSHQSKKLDRESEHISQGTIPEIYEKRRKETISHTQSMQEKYL 120  
Allele 4 MGESQSKQESNTRVAQHGSQQDVPDPTFQTKRALERERSKPRRPLFRVQLQSLPGWSSSTNDVPLSQLIREMDHESRRHSHQSKKLDRESEHISQGTIPEIYEKRRKETISHTQSMQEKYL 120  
Allele 5 MGESQSKQESNTRVAQHGSQQDVPDPTFQTKRALERERSKPRRPLFRVQLQSLPGWSSSTNDVPLSQLIREMDHESRRHSHQSKKLDRESEHISQGTIPEIYEKRRKETISHTQSMQEKYL 120

## NACHT

Allele 1 FQNFTKLLLLQKCCPGGSEKLVRESWHPVCPVEEGGHHMIEIQDLDFPNLDTEKKPQLVIEGAAGIGKSTLARQVKRAWDEGQLYRDRFQHVFFFSCRELAQCKQLSLAELIAQGGVEPTA 240  
Allele 2 FQNFTKLLLLQKCCPGGSEKLVRESWHPVCPVEEGGHHMIEIQDLDFPNLDTEKKPQLVIEGAAGIGKSTLARQVKRAWDEGQLYRDRFQHVFFFSCRELAQCKQLSLAELIAQGGVEPTA 240  
Allele 3 FQNFTKLLLLQKCCPGGSEKLVRESWHPVCPVEEGGHHMIEIQDLDFPNLDTEKKPQLVIEGAAGIGKSTLARQVKRAWDEGQLYRDRFQHVFFFSCRELAQCKQLSLAELIAQGGVEPTA 240  
Allele 4 FQNFTKLLLLQKCCPGGSEKLVRESWHPVCPVEEGGHHMIEIQDLDFPNLDTEKKPQLVIEGAAGIGKSTLARQVKRAWDEGQLYRDRFQHVFFFSCRELAQCKQLSLAELIAQGGVEPTA 240  
Allele 5 FQNFTKLLLLQKCCPGGSEKLVRESWHPVCPVEEGGHHMIEIQDLDFPNLDTEKKPQLVIEGAAGIGKSTLARQVKRAWDEGQLYRDRFQHVFFFSCRELAQCKQLSLAELIAQGGVEPTA 240

Allele 1 PTRQILSRPEKLLFILDGIDEPAWVLEDQNPVLCVHWSQAQPVHTLLGSLGKSIPEASLMLTARTTALQKLVPSLQPPHRVEVLGFEFERKDYFYKYFAKERNTIIDFNLIGSIPVL 360  
Allele 2 PTRQILSRPEKLLFILDGIDEPAWVLEDQNPVLCVHWSQAQPVHTLLGSLGKSIPEASLMLTARTTALQKLVPSLQPPHRVEVLGFEFERKDYFYKYFAKERNTIIDFNLIGSIPVL 360  
Allele 3 PTRQILSRPEKLLFILDGIDEPAWVLEDQNPVLCVHWSQAQPVHTLLGSLGKSIPEASLMLTARTTALQKLVPSLQPPHRVEVLGFEFERKDYFYKYFAKERNTIIDFNLIGSIPVL 360  
Allele 4 PTRQILSRPEKLLFILDGIDEPAWVLEDQNPVLCVHWSQAQPVHTLLGSLGKSIPEASLMLTARTTALQKLVPSLQPPHRVEVLGFEFERKDYFYKYFAKERNTIIDFNLIGSIPVL 360  
Allele 5 PTRQILSRPEKLLFILDGIDEPAWVLEDQNPVLCVHWSQAQPVHTLLGSLGKSIPEASLMLTARTTALQKLVPSLQPPHRVEVLGFEFERKDYFYKYFAKERNTIIDFNLIGSIPVL 360

Allele 1 LTLCEVPWCWLLCTCLEKMQQGEVLSLTSQTTTALCLKYLSTIPGQHLSTQLRTRTCLSLAEEGICQRRRTLFKSDLCCKQGLAEDAATFLKIGVLQRQPSLSYSFAHLCLQEFFAAM 480  
Allele 2 LTLCEVPWCWLLCTCLEKMQQGEVLSLTSQTTTALCLKYLSTIPGQHLSTQLRTRTCLSLAEEGICQRRRTLFKSDLCCKQGLAEDAATFLKIGVLQRQPSLSYSFAHLCLQEFFAAM 480  
Allele 3 LTLCEVPWCWLLCTCLEKMQQGEVLSLTSQTTTALCLKYLSTIPGQHLSTQLRTRTCLSLAEEGICQRRRTLFKSDLCCKQGLAEDAATFLKIGVLQRQPSLSYSFAHLCLQEFFAAM 480  
Allele 4 LTLCEVPWCWLLCTCLEKMQQGEVLSLTSQTTTALCLKYLSTIPGQHLSTQLRTRTCLSLAEEGICQRRRTLFKSDLCCKQGLAEDAATFLKIGVLQRQPSLSYSFAHLCLQEFFAAM 480  
Allele 5 LTLCEVPWCWLLCTCLEKMQQGEVLSLTSQTTTALCLKYLSTIPGQHLSTQLRTRTCLSLAEEGICQRRRTLFKSDLCCKQGLAEDAATFLKIGVLQRQPSLSYSFAHLCLQEFFAAM 480

Allele 1 SYILEDSEEAHGMNDRTVETLVVERYGRQNLFEAPTFRVFLGLLNTRMREMEMENIACKFPWETKLLKLSIIGEPFCQPCHLGLFHCYLYENQEEELLTETMLCFPLTASGPNHMEATV 600  
Allele 2 SYILEDSEEAHGMNDRTVETLVVERYGRQNLFEAPTFRVFLGLLNTRMREMEMENIACKFPWETKLLKLSIIGEPFCQPCHLGLFHCYLYENQEEELLTETMLCFPLTASGPNHMEATV 600  
Allele 3 SYILEDSEEAHGMNDRTVETLVVERYGRQNLFEAPTFRVFLGLLNTRMREMEMENIACKFPWETKLLKLSIIGEPFCQPCHLGLFHCYLYENQEEELLTETMLCFPLTASGPNHMEATV 600  
Allele 4 SYILEDSEEAHGMNDRTVETLVVERYGRQNLFEAPTFRVFLGLLNTRMREMEMENIACKFPWETKLLKLSIIGEPFCQPCHLGLFHCYLYENQEEELLTETMLCFPLTASGPNHMEATV 600  
Allele 5 SYILEDSEEAHGMNDRTVETLVVERYGRQNLFEAPTFRVFLGLLNTRMREMEMENIACKFPWETKLLKLSIIGEPFCQPCHLGLFHCYLYENQEEELLTETMLCFPLTASGPNHMEATV 600

## LRR

Allele 1 FQTNVKKRLVIQTDMEMLVVTFICITFSHVRSLRLKGGQQEYKLTAPAMVLYRWTPISEASWVLFNSLCKTRNLEELDLSGNPLSYSAVRSLCTALRQPGCRKLTWLWVDCGLT SRCCSF 720  
Allele 2 FQTNVKKRLVIQTDMEMLVVTFICITFSHVRSLRLKGGQQEYKLTAPAMVLYRWTPISEASWVLFNSLCKTRNLEELDLSGNPLSYSAVRSLCTALRQPGCRKLTWLWVDCGLT SRCCSF 720  
Allele 3 FQTNVKKRLVIQTDMEMLVVTFICITFSHVRSLRLKGGQQEYKLTAPAMVLYRWTPISEASWVLFNSLCKTRNLEELDLSGNPLSYSAVRSLCTALRQPGCRKLTWLWVDCGLT SRCCSF 720  
Allele 4 FQTNVKKRLVIQTDMEMLVVTFICITFSHVRSLRLKGGQQEYKLTAPAMVLYRWTPISEASWVLFNSLCKTRNLEELDLSGNPLSYSAVRSLCTALRQPGCRKLTWLWVDCGLT SRCCSF 720  
Allele 5 FQTNVKKRLVIQTDMEMLVVTFICITFSHVRSLRLKGGQQEYKLTAPAMVLYRWTPISEASWVLFNSLCKTRNLEELDLSGNPLSYSAVRSLCTALRQPGCRKLTWLWVDCGLT SRCCSF 720

Allele 1 LASMLS AHSRLAELDLRLNDLGDNGVRQLCEGLRNPACNLSILRLDQASLSSEQVITELRALETKNPKLFISSWTMSHMTMPTENTDGEESLTS SKQQQQSGDKHMEPLGTDFFWFGPSG 840  
Allele 2 LASMLS AHSRLAELDLRLNDLGDNGVRQLCEGLRNPACNLSILRLDQASLSSEQVITELRALETKNPKLFISSWTMSHMTMPTENTDGEESLTS SKQQQQSGDKHMEPLGTDFFWFGPSG 840  
Allele 3 LASMLS AHSRLAELDLRLNDLGDNGVRQLCEGLRNPACNLSILRLDQASLSSEQVITELRALETKNPKLFISSWTMSHMTMPTENTDGEESLTS SKQQQQSGDKHMEPLGTDFFWFGPSG 840  
Allele 4 LASMLS AHSRLAELDLRLNDLGDNGVRQLCEGLRNPACNLSILRLDQASLSSEQVITELRALETKNPKLFISSWTMSHMTMPTENTDGEESLTS SKQQQQSGDKHMEPLGTDFFWFGPSG 840  
Allele 5 LASMLS AHSRLAELDLRLNDLGDNGVRQLCEGLRNPACNLSILRLDQASLSSEQVITELRALETKNPKLFISSWTMSHMTMPTENTDGEESLTS SKQQQQSGDKHMEPLGTDFFWFGPSG 840

Allele 1 PVSTEVVDRERNLYRVRPMAAGSYHCPSTGLHFVVTRAVTIEIGFCAWSQFLHETPLQSHHMVAGPLFDIKAHEGAVTAVCLPHFVSLQEGKVDSSLFVHAHFQDHGMVLET PARVEPHF 960  
Allele 2 PVSTEVVDRERNLYRVRPMAAGSYHCPSTGLHFVVTRAVTIEIGFCAWSQFLHETPLQSHHMVAGPLFDIKAHEGAVTAVCLPHFVSLQEGKVDSSLFVHAHFQDHGMVLET PARVEPHF 960  
Allele 3 PVSTEVVDRERNLYRVRPMAAGSYHCPSTGLHFVVTRAVTIEIGFCAWSQFLHETPLQSHHMVAGPLFDIKAHEGAVTAVCLPHFVSLQEGKVDSSLFVHAHFQDHGMVLET PARVEPHF 960  
Allele 4 PVSTEVVDRERNLYRVRPMAAGSYHCPSTGLHFVVTRAVTIEIGFCAWSQFLHETPLQSHHMVAGPLFDIKAHEGAVTAVCLPHFVSLQEGKVDSSLFVHAHFQDHGMVLET PARVEPHF 960  
Allele 5 PVSTEVVDRERNLYRVRPMAAGSYHCPSTGLHFVVTRAVTIEIGFCAWSQFLHETPLQSHHMVAGPLFDIKAHEGAVTAVCLPHFVSLQEGKVDSSLFVHAHFQDHGMVLET PARVEPHF 960

Allele 1 AVLENPFSFPMGVLLRMPAVGHFIPITISITLIYYRLLYLEDITFHLYLVPNDCTIRKAI DEEELKQFVRINKPPVDALYVGSRYIVSSSKEVEILPKLELELCYRSPRESQLFSEIYVG 1080  
Allele 2 AVLENPFSFPMGVLLRMPAVGHFIPITISITLIYYRLLYLEDITFHLYLVPNDCTIRKAI DEEELKQFVRINKPPVDALYVGSRYIVSSSKEVEILPKLELELCYRSPRESQLFSEIYVG 1080  
Allele 3 AVLENPFSFPMGVLLRMPAVGHFIPITISITLIYYRLLYLEDITFHLYLVPNDCTIRKAI DEEELKQFVRINKPPVDALYVGSRYIVSSSKEVEILPKLELELCYRSPRESQLFSEIYVG 1080  
Allele 4 AVLENPFSFPMGVLLRMPAVGHFIPITISITLIYYRLLYLEDITFHLYLVPNDCTIRKAI DEEELKQFVRINKPPVDALYVGSRYIVSSSKEVEILPKLELELCYRSPRESQLFSEIYVG 1080  
Allele 5 AVLENPFSFPMGVLLRMPAVGHFIPITISITLIYYRLLYLEDITFHLYLVPNDCTIRKAI DEEELKQFVRINKPPVDALYVGSRYIVSSSKEVEILPKLELELCYRSPRESQLFSEIYVG 1080

## CARD

Allele 1 NIGSGINQLTDDKYMNIWEALLKPGDLR PALPRMASAPK DAPALLHFVDQHQREQLVARVTSVDPDLLDKLHGLVLS EEDYETVRAEATNQDKMRKLF RFGSR SWSWCKDHFYQALKETH 1200  
Allele 2 NIGSGINQLTDDKYMNIWEALLKPGDLR PALPRMASAPK DAPALLHFVDQHQREQLVARVTSVDPDLLDKLHGLVLS EEDYETVRAEATNQDKMRKLF RFGSR SWSWCKDHFYQALKETH 1200  
Allele 3 NIGSGINQLTDDKYMNIWEALLKPGDLR PALPRMASAPK DAPALLHFVDQHQREQLVARVTSVDPDLLDKLHGLVLS EEDYETVRAEATNQDKMRKLF RFGSR SWSWCKDHFYQALKETH 1200  
Allele 4 NIGSGINQLTDDKYMNIWEALLKPGDLR PALPRMASAPK DAPALLHFVDQHQREQLVARVTSVDPDLLDKLHGLVLS EEDYETVRAEATNQDKMRKLF RFGSR SWSWCKDHFYQALKETH 1200  
Allele 5 NIGSGINQLTDDKYMNIWEALLKPGDLR PALPRMASAPK DAPALLHFVDQHQREQLVARVTSVDPDLLDKLHGLVLS EEDYETVRAEATNQDKMRKLF RFGSR SWSWCKDHFYQALKETH 1200

Allele 1 PHLIMDLLEKSGGVS VRL 1218  
Allele 2 PHLIMDLLEKSGGVS VRL 1218  
Allele 3 PHLIMDLLEKSGGVS VRL 1218  
Allele 4 PHLIMDLLEKSGGVS VRL 1218  
Allele 5 PHLIMDLLEKSGGVS VRL 1218

**Allele 1: LT-Sensitive (Brown Norway, Wistar, Sprague Dawley, BN-Lx, Dahl/SS)**

**Allele 2: LT-Sensitive (Fischer CDF)**

**Allele 3: LT-Resistant (Zucker-Lean)**

**Allele 4: LT-Resistant (Copenhagen)**

**Allele 5 LT-Resistant (Lewis, Wistar-Kyoto, SHR, SHR/Lj)**
